# Supplementary material for: Red blood cell membrane-enveloped O2 self-supplementing biomimetic nanoparticles for tumor imaging-guided enhanced sonodynamic therapy
Source: PubMed Central journal article supplement (PMC6929970; doi:10.7150/thno.37930), 2020-01-01
Supplement: thnov10p0867s1.pdf [file thnov10p0867s1.pdf]

## Supporting Information

### **Red blood cell membrane-enveloped O<sub>2</sub> self-supplementing biomimetic nanoparticles for tumor imaging-guided enhanced sonodynamic therapy**

Cheng Li <sup>a,b</sup>, Xiao-Quan Yang <sup>a</sup>, Jie An <sup>a</sup>, Kai Cheng <sup>a</sup>, Xiao-Lin Hou <sup>a</sup>, Xiao-Shuai Zhang <sup>a</sup>, Yong-Guo Hu <sup>a</sup>, Bo Liu <sup>a</sup>, Yuan-Di Zhao <sup>a,c,\*</sup>

<sup>a</sup> Britton Chance Center for Biomedical Photonics at Wuhan National Laboratory for Optoelectronics-Hubei Bioinformatics & Molecular Imaging Key Laboratory, Department of Biomedical Engineering, College of Life Science and Technology, Huazhong University of Science and Technology, Wuhan 430074, Hubei, P. R. China

<sup>b</sup> Beijing Advanced Innovation Center for Big Data-Based Precision Medicine, School of medicine, Beihang University, Beijing 100191, P. R. China

<sup>c</sup> Key Laboratory of Biomedical Photonics (HUST), Ministry of Education, Huazhong University of Science and Technology, Wuhan 430074, Hubei, P. R. China

\* Corresponding author. Tel/Fax: +86-27-8779-2202. Email address: zydi@mail.hust.edu.cn (Y.D. Zhao).

## Experimental Section

### Materials

Diethyldithiocarbamic acid silver salt (Ag(DDTC), 98 %) and tris(4,7-diphenyl-1,10-phenanthroline)ruthenium(II) dichloride complex ( $[\text{Ru}(\text{dpp})_3\text{Cl}_2]$ ) were purchased from Aladdin Industrial Co., Ltd. (Shanghai, China); octadecene (ODE, 90 %), 1,3-diphenylisobenzofuran (DPBF, 97 %), phenethyl isothiocyanate (PEITC, 99 %), 2,7-dichlorofluorescein diacetate (DCFH-DA, 97 %) and Pluronic F-127 were purchased from Sigma-Aldrich (St. Louis, MO, USA); deferoxaminebmesylate was bought from Yuanye Technology Co., Ltd. (Shanghai, China). Oxygen-deficient marker Pimonidazole kit (Hypoxyprobe-1 Plus Kit) was purchased from Hypoxyprobe Inc. Other chemicals and reagents were used as received without any further purification.

### Characterizations

Probe morphology characterization was performed by HT7700 (Hitachi, Japan) transmission electron microscopy. The absorption spectra were measured by UV-2550 UV-vis spectrophotometer (Shimadzu, Japan). The near infrared fluorescence (NIR) spectra of  $\text{Ag}_2\text{S}$  and QD@P were determined by NIRQUEST512-1.7 fiber spectrometer (Ocean Optics, USA). ZS90 ZetaSizer (Malvern, UK) was employed to characterize the size and surface potential of probe. The equipment also used in the experiment includes EMXmicro-6/1 ESR (Bruker, Germany), JPBJ-609L portable dissolved oxygen meter, ELX808IU microplate reader (Biotek, USA), FluoView FV1000 confocal fluorescence microscope (Olympus, Japan) and IX71 inverted fluorescence microscope (Olympus, Japan). NIR imaging system [1] was built up by our laboratory.

## **Pharmacokinetics and distribution of (QD@P)Rs**

(QD@P)Rs (25 mg/kg) were injected *i.v.* into male Kunming mice. At 5 min, 1, 3, 6, 12 and 24 h after injection, blood was collected from the mice and dissolved in nitric acid to obtain the total amount of Ag<sup>+</sup> by graphite furnace atomic absorption spectrometry. C26 tumor-bearing mice were injected with (QD@P)Rs (25 mg/kg) intravenously, and the fluorescence intensity of different organs was measured by fluorescence imaging system at different time points.

## **Hemolysis assay**

The blood compatibility of (QD@P)Rs were evaluated by hemolysis assay. 2 mL fresh mice blood was diluted with PBS to 4 mL and centrifuged at 3500 rpm for 5 min to isolate red blood cells (RBCs). The RBCs were further washed for five times and finally diluted to 20 mL PBS. Different concentrations of (QD@P)R were incubated with RBCs at 37 °C for 4 h, water as positive control and PBS as negative control. The absorbance of supernatants from each group was measured using microplate reader at 550 nm. Hemolysis percentage =  $(OD_{\text{test}} - OD_{\text{negative control}}) / (OD_{\text{positive control}} - OD_{\text{negative control}}) \times 100 \%$ .

## **Statistical Analysis**

All data were presented as mean  $\pm$ SD unless otherwise stated. All experiments were performed at least in triplicate. The statistical significance was determined using two-tailed Student's test (\* $p < 0.05$ , \*\* $p < 0.01$ ) unless otherwise stated.

## Supplementary Figures

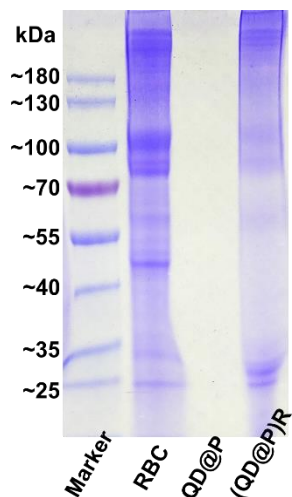

**Figure S1.** SDS-PAGE analysis of membrane protein changes.

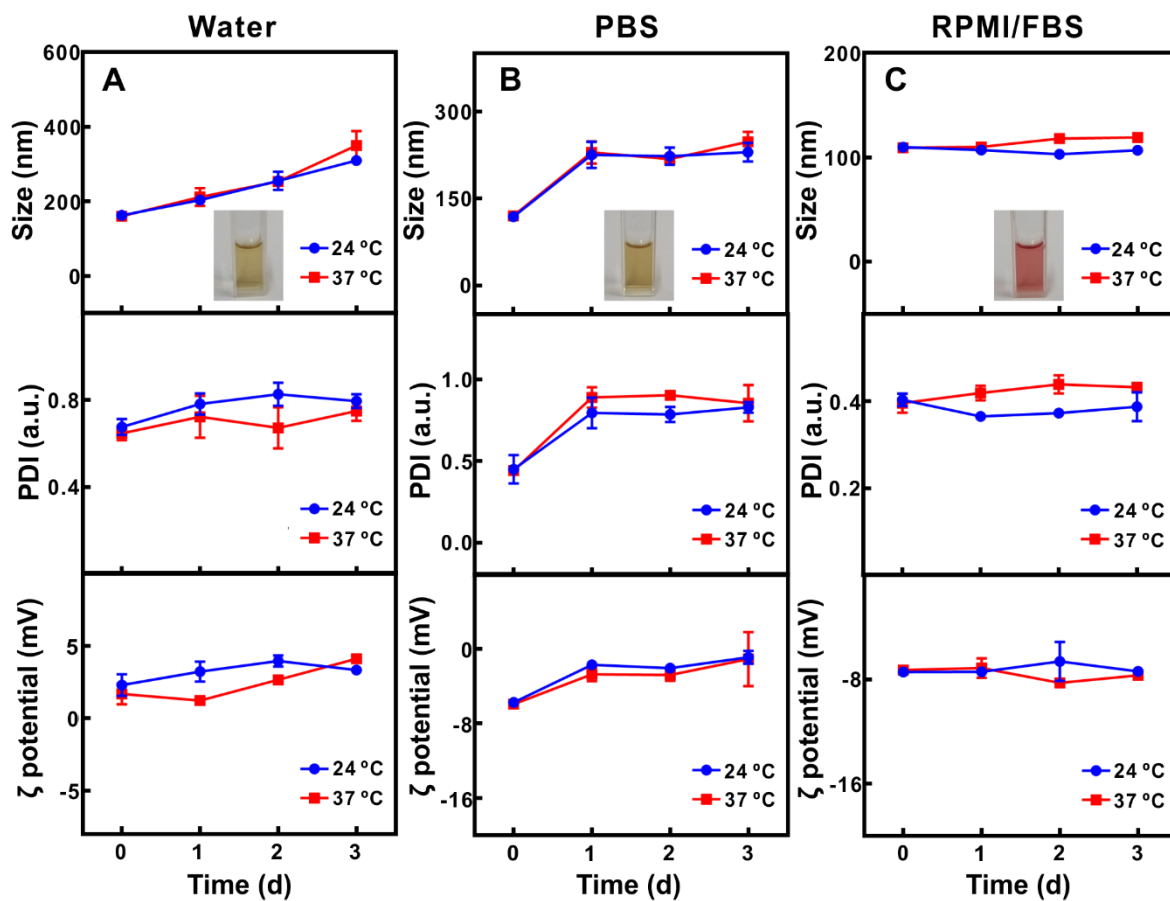

**Figure S2.** The change of hydrated particle size, polydispersity index (PDI) and zeta potential over time of (QD@P)Rs in water (A), PBS (B) and RPMI 1640 medium with 10 % FBS (C) at 24 and 37 °C, respectively.

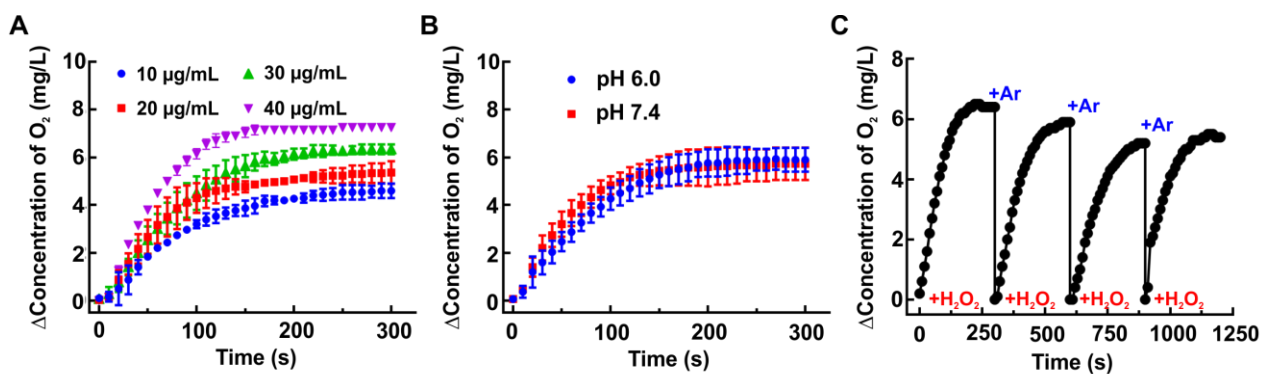

**Figure S3.** O<sub>2</sub> generation by tuning the concentrations of (QD@P)R (10~40 µg/mL) after incubating with H<sub>2</sub>O<sub>2</sub> (1 mM) (A); O<sub>2</sub> generation by (QD@P)Rs (30 µg/mL) after incubating with H<sub>2</sub>O<sub>2</sub> (1 mM) under different pH (B) and after cyclic additions of H<sub>2</sub>O<sub>2</sub> (1 mM) (C).

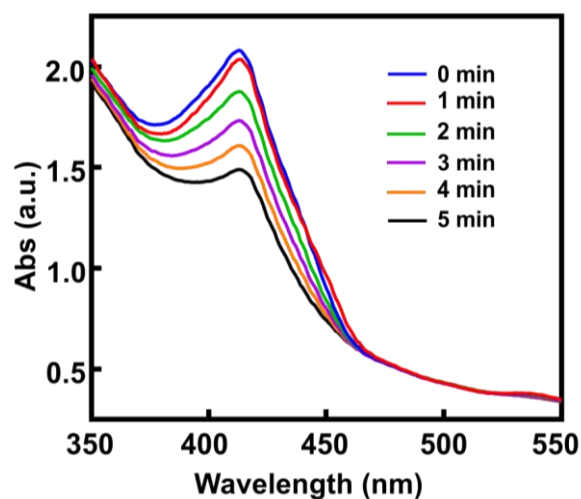

**Figure S4.** UV-Vis absorption spectra of DPBF in the presence of QD@Ps upon US irradiation for prolonged duration.

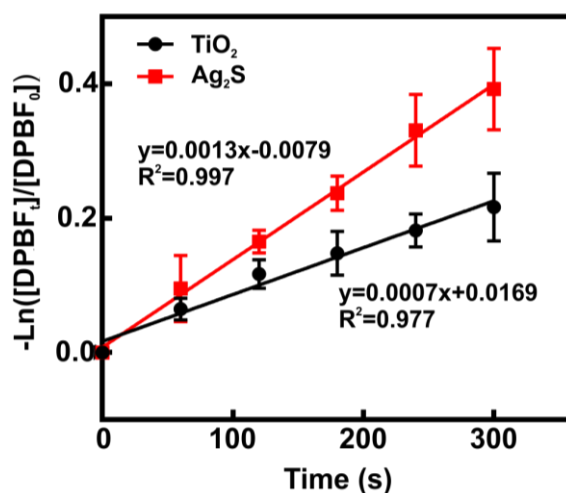

**Figure S5.** Firstorder plot of DPBF absorbance of TiO<sub>2</sub> and Ag<sub>2</sub>S QDs versus time.

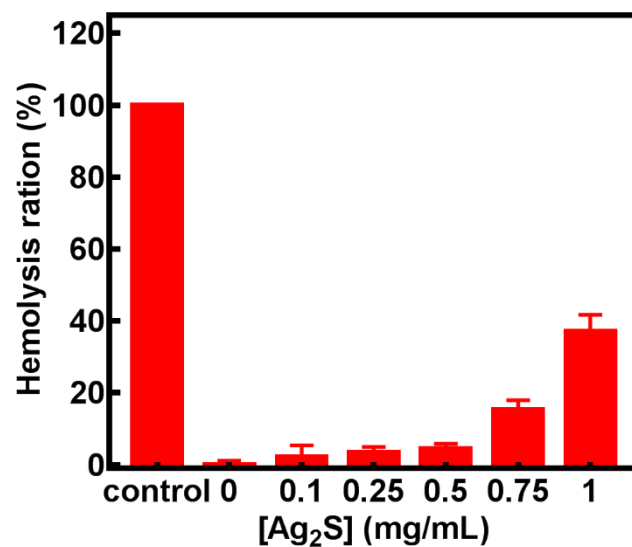

**Figure S6.** Hemolysis of (QD@P)Rs at various concentrations.

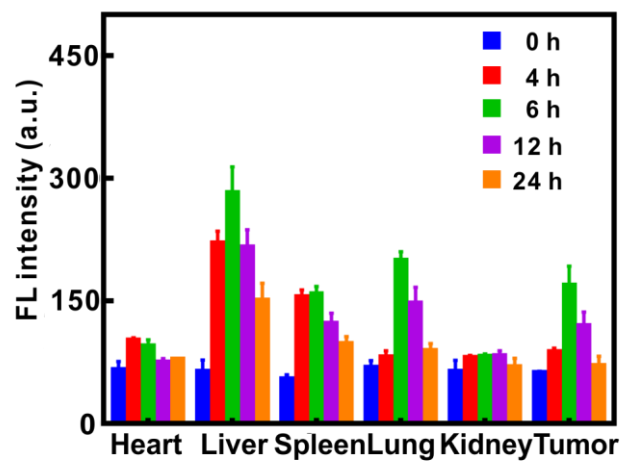

**Figure S7.** Distribution of organs and tumor at different time points after injection of QD@Ps into C26 tumor-bearing mice.

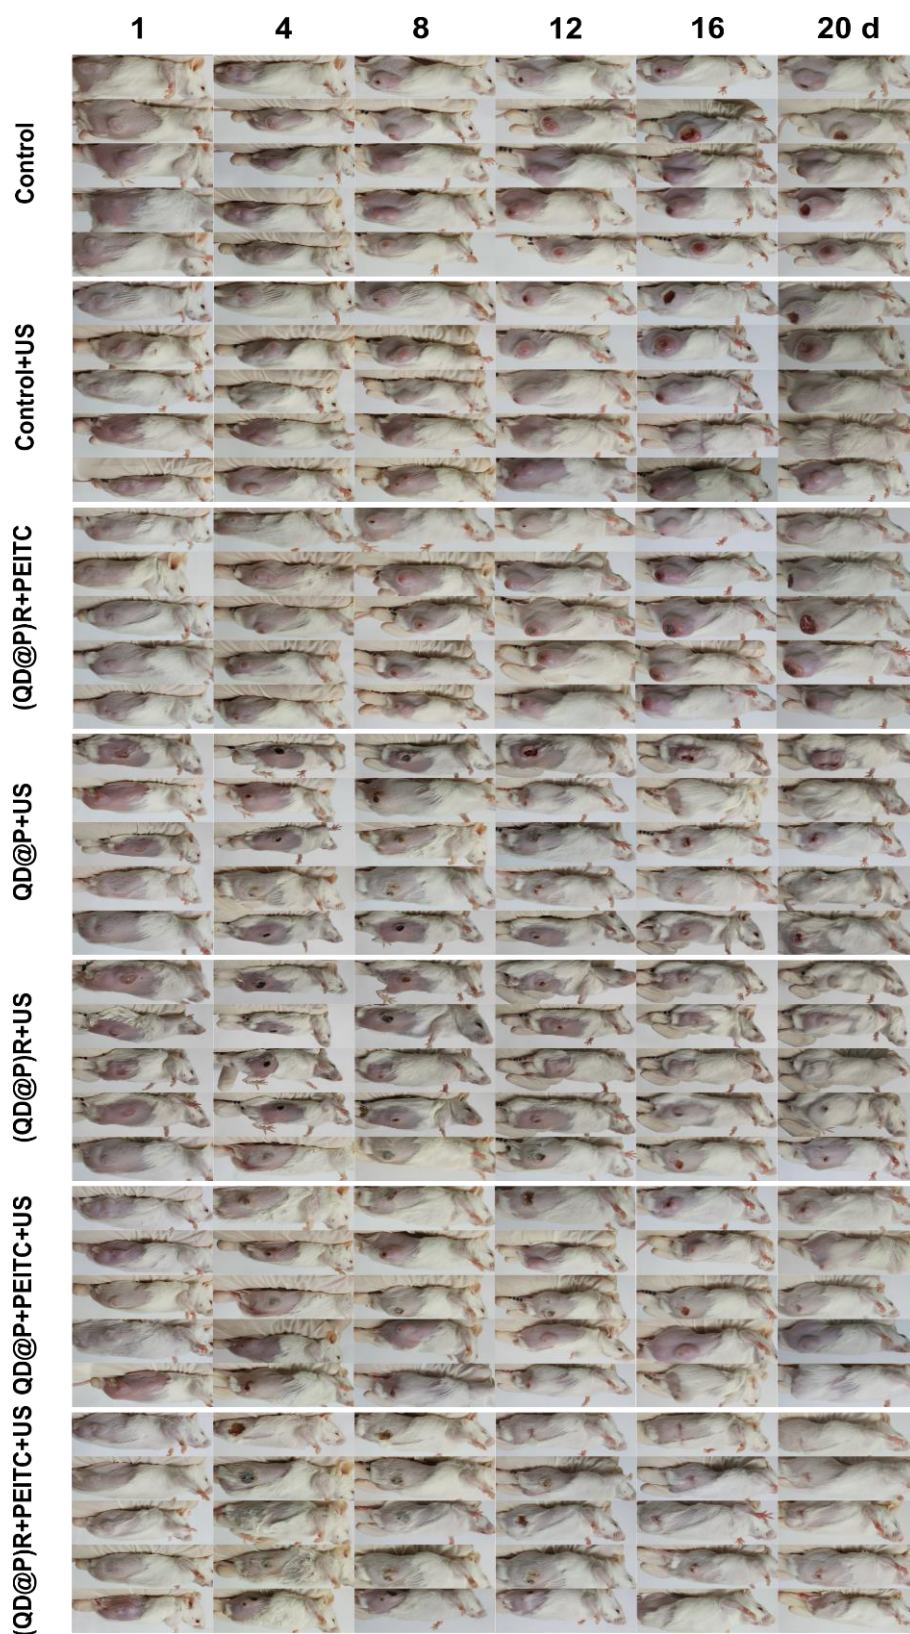

**Figure S8.** Images of mice with various treatments during 20 d.

## References

- [1] Wang K, Wang Q, Luo Q, Yang X. Fluorescence molecular tomography in the second near-infrared window. *Opt Express*. 2015; 23: 12669-79.
